# Supplementary material for: Towards quantitative molecular mapping of cells by Raman microscopy: using AFM for decoupling molecular concentration and cell topography
Source: Royal Society of Chemistry journal article supplement (doi:10.1039/c5fd00172b), 2015-11-26
Supplement: c5fd00172b1.pdf [file c5fd00172b1.pdf]

SUPPLEMENTARY INFORMATION

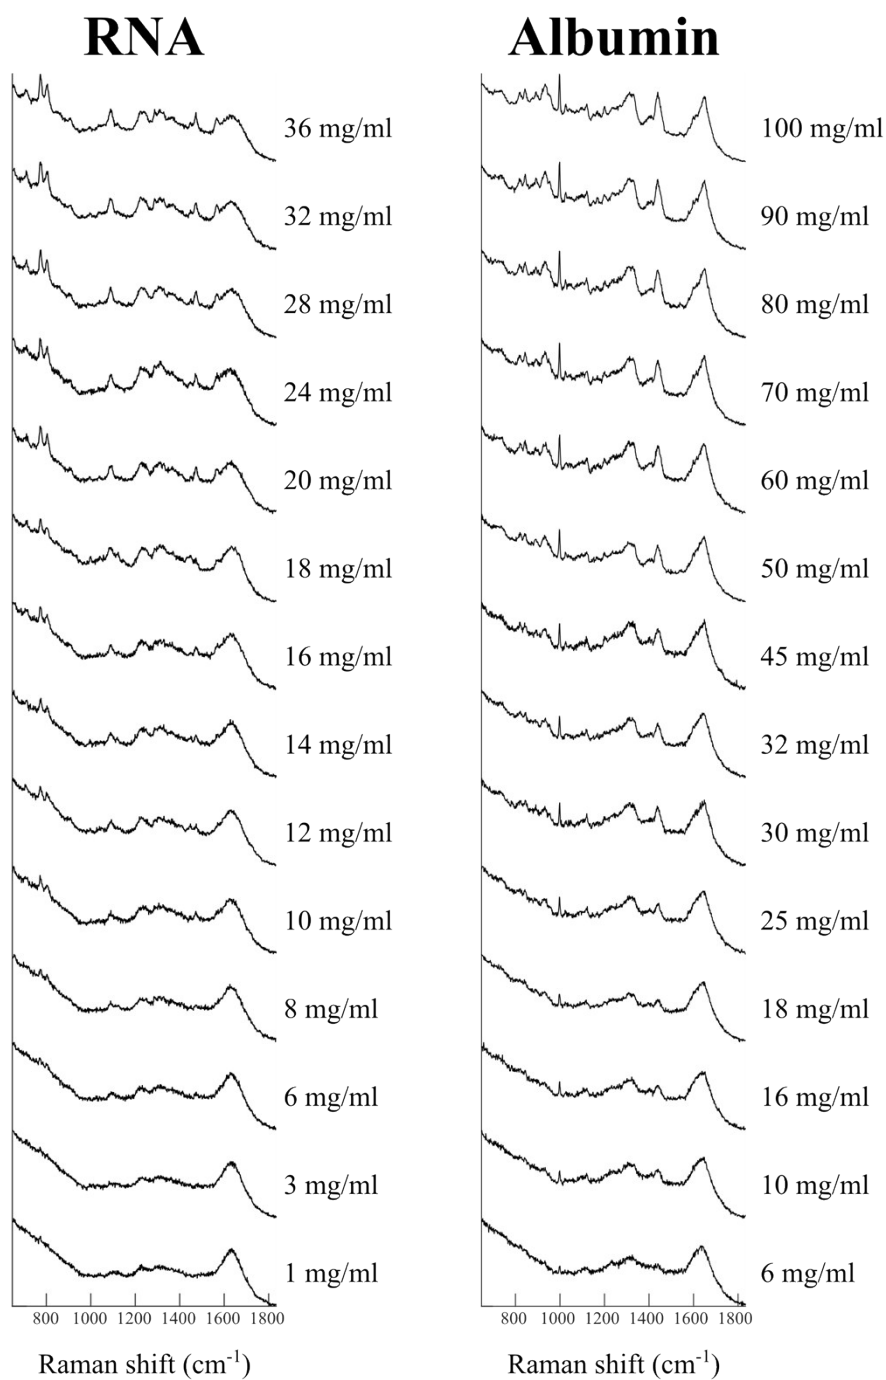

**Figure S1:** Raman spectra used for the solution-based calibration.

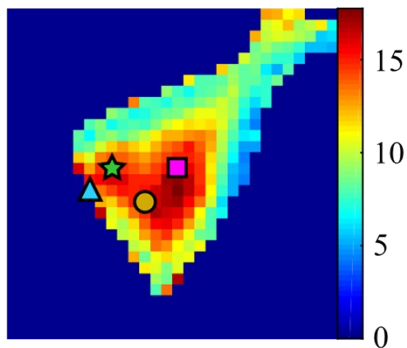

**RNA  
concentration**

★ 16 mg/ml

■ 17 mg/ml

● 10 mg/ml

▲ 21 mg/ml

**SVD  
PC1-8**

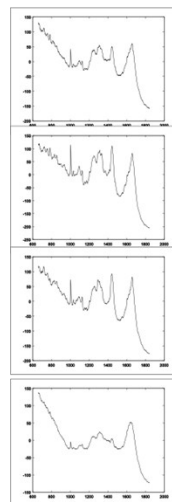

**SVD  
PC2-8**

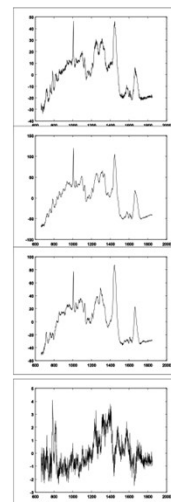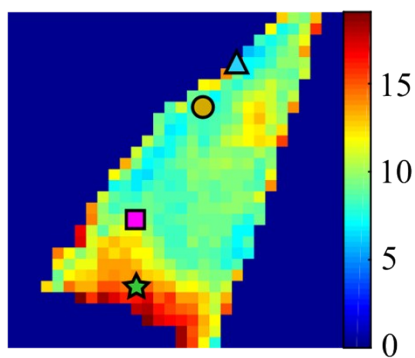

★ 16 mg/ml

■ 12 mg/ml

● 8 mg/ml

▲ 16 mg/ml

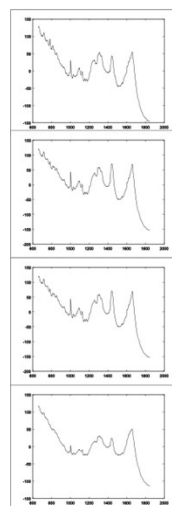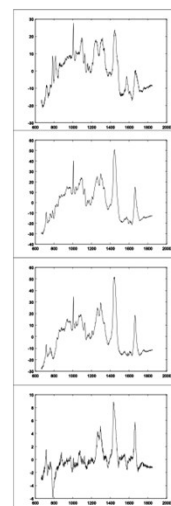

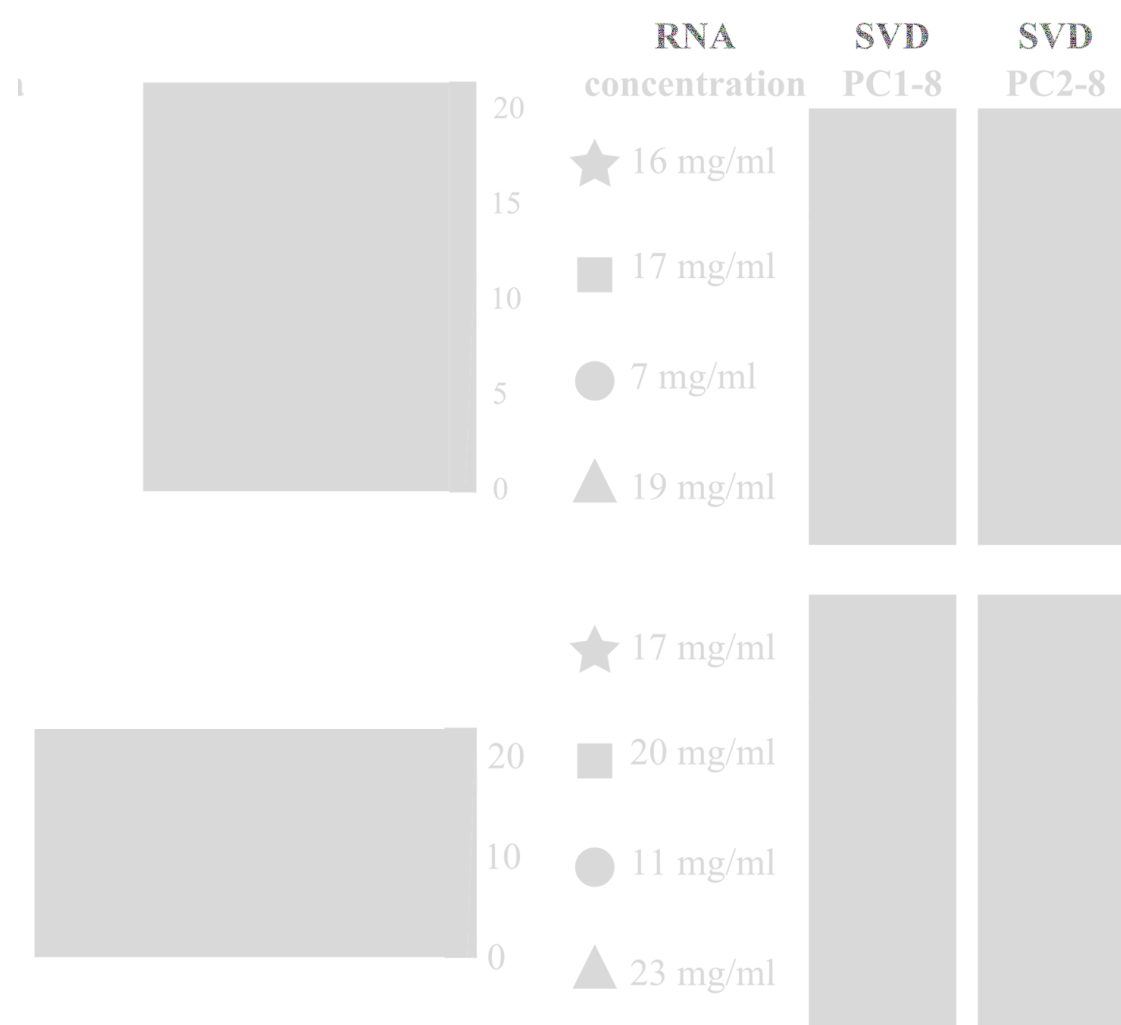

**Figure S2:** Selected Raman spectra from the concentration maps presented in Figure 4.
